# Supplementary material for: Target Enrichment Metagenomics Reveals Human Pegivirus-1 in Pediatric Hematopoietic Stem Cell Transplantation Recipients
Source: MDPI journal article supplement (doi:10.3390/v14040796), 2022-04-12
Supplement: s1 [file s1]

## Supplementary Tables

**Table S1: qRT-PCR results and the Virus Identification Pipeline analysis output for the positive internal control, Newcastle Disease Virus (NDV).**

| Sample number | NDV particles<br>(per 1ml blood) | % NDV coverage | Read hits | Average depth<br>coverage | qRT-PCR  |
|---------------|----------------------------------|----------------|-----------|---------------------------|----------|
| 001-D0        | 1×10 <sup>4</sup>                | 100            | 139,882   | 3,910.70                  | Positive |
| 001-D3        | 1×10 <sup>4</sup>                | 100            | 1,737,559 | 48,498.28                 | Positive |
| 002-D0        | 1×10 <sup>4</sup>                | 100            | 362,876   | 11,079.96                 | Positive |
| 002-D3        | 1×10 <sup>4</sup>                | 100            | 2,302,948 | 68,348.46                 | Positive |
| 003-D0        | 1×10 <sup>4</sup>                | 100            | 741,509   | 21,908.69                 | Positive |
| 003-D3        | 1×10 <sup>4</sup>                | 100            | 5,415     | 133.25                    | Positive |
| 004-D0        | 1×10 <sup>4</sup>                | 100            | 2,232,001 | 69759.43                  | Positive |
| 004-D3        | 1×10 <sup>4</sup>                | 100            | 21,688    | 661.89                    | Positive |
| 005-D0        | 1×10 <sup>4</sup>                | 100            | 268,477   | 8,058.97                  | Positive |
| 006-D0        | 1×10 <sup>4</sup>                | 99.28          | 6,762     | 191.35                    | Positive |
| 006-D3        | 1×10 <sup>4</sup>                | 100            | 1,057,996 | 32,375.66                 | Positive |
| 007-D0        | 1×10 <sup>4</sup>                | 100            | 69,031    | 1,839                     | Positive |
| 007-D3        | 1×10 <sup>4</sup>                | 100            | 841,928   | 21,960                    | Positive |
| 008-D0        | 1×10 <sup>3</sup>                | 100            | 76,091    | 2,180                     | Positive |
| 008-D3        | 1×10 <sup>3</sup>                | 99.59          | 7,035     | 159.86                    | Positive |
| 009-D0        | 1×10 <sup>3</sup>                | 100            | 12,533    | 304.65                    | Positive |
| 009-D3        | 1×10 <sup>3</sup>                | 99.95          | 27,649    | 697.15                    | Positive |
| 011-D0        | 1×10 <sup>4</sup>                | 100            | 603,461   | 17,672                    | Positive |
| 011-D3        | 1×10 <sup>4</sup>                | 100            | 758,192   | 23,067                    | Positive |
| 012-D0        | 1×10 <sup>4</sup>                | 100            | 3,165,402 | 96,396                    | Positive |
| 012-D3        | 1×10 <sup>4</sup>                | 100            | 574,423   | 15,378                    | Positive |
| 013-D0        | 1×10 <sup>4</sup>                | 100            | 138,532   | 4,116                     | Positive |
| 013-D3        | 1×10 <sup>4</sup>                | 100            | 102,209   | 3,057                     | Positive |
| 015-DA        | 1×10 <sup>4</sup>                | 100            | 85,325    | 2,117                     | Positive |
| 015-D0        | 1×10 <sup>4</sup>                | 100            | 843,550   | 24,990                    | Positive |
| 015-D3        | 1×10 <sup>4</sup>                | 100            | 30,992    | 931                       | Positive |

**Table S2: Sequencing read distribution as determined by Virus Identification Pipeline [1]**

| Sample code | Total number of reads (million) | Viral reads % | Host reads % | Other reads % | Bacterial reads % | Low quality reads % |
|-------------|---------------------------------|---------------|--------------|---------------|-------------------|---------------------|
| 001-D0      | 1.83                            | 21.4          | 18.4         | 54.1          | 0.0               | 6.1                 |
| 001-D3      | 3.76                            | 48.4          | 40.3         | 7.9           | 0.0               | 3.4                 |
| 002-DA      | 2.66                            | 91.8          | 1.7          | 0.2           | 0.0               | 6.3                 |
| 002-D0      | 2.11                            | 28.5          | 26.6         | 39.4          | 0.0               | 5.5                 |
| 002-D3      | 4.02                            | 59.6          | 30.8         | 6.8           | 0.0               | 2.9                 |
| 003-D0      | 2.46                            | 32.0          | 59.1         | 5.2           | 0.0               | 3.8                 |
| 003-D3      | 1.59                            | 10.6          | 48.6         | 34.7          | 0.0               | 6.0                 |
| 004-D0      | 3.91                            | 58.8          | 33.7         | 5.1           | 0.0               | 2.4                 |
| 004-D3      | 0.73                            | 5.5           | 85.5         | 3.6           | 0.0               | 5.4                 |
| 005-D0      | 1.90                            | 16.2          | 74.4         | 4.7           | 0.0               | 4.7                 |
| 006-D0      | 0.60                            | 14.2          | 66.0         | 14.3          | 0.0               | 5.5                 |
| 006-D3      | 2.63                            | 42.8          | 43.4         | 9.2           | 0.0               | 4.6                 |
| 007-D0      | 1.97                            | 13.7          | 43.8         | 36.7          | 0.0               | 5.9                 |
| 007-D3      | 1.05                            | 82.1          | 6.0          | 9.8           | 0.0               | 2.1                 |
| 008-D0      | 2.06                            | 6.8           | 79.3         | 6.4           | 0.0               | 7.6                 |
| 008-D3      | 2.19                            | 2.8           | 87.1         | 4.5           | 0.0               | 5.6                 |
| 009-D0      | 1.97                            | 3.2           | 87.2         | 4.5           | 0.0               | 5.0                 |
| 009-D3      | 1.27                            | 2.5           | 88.7         | 3.7           | 0.0               | 5.1                 |
| 011-DA      | 5.36                            | 69.8          | 15.8         | 12.8          | 0.0               | 1.6                 |
| 011-D0      | 1.86                            | 36.8          | 53.3         | 6.1           | 0.0               | 3.8                 |
| 011-D3      | 2.20                            | 38.9          | 52.7         | 4.6           | 0.0               | 3.8                 |
| 012-D0      | 4.61                            | 72.1          | 12.8         | 12.7          | 0.0               | 2.5                 |
| 012-D3      | 0.66                            | 87.8          | 3.0          | 7.4           | 0.0               | 1.8                 |
| 013-D0      | 1.49                            | 12.7          | 74.6         | 7.9           | 0.0               | 4.8                 |
| 013-D3      | 1.70                            | 19.4          | 30.9         | 43.7          | 0.0               | 6.0                 |
| 015-DA      | 1.04                            | 15.5          | 76.5         | 4.5           | 0.0               | 3.5                 |
| 015-D0      | 3.4                             | 59.4          | 2.1          | 36.2          | 0.0               | 2.3                 |
| 015-D3      | 0.19                            | 43.9          | 21.2         | 32.1          | 0.0               | 2.8                 |

**Table S3: Polymorphic sites in the recovered human pegivirus-1 genome sequences**

| Sample | Position with respect to the reference genome NC_001710.1 | Variant (%) |       |       |       |
|--------|-----------------------------------------------------------|-------------|-------|-------|-------|
|        |                                                           | A           | T     | C     | G     |
| 002_D0 | 363                                                       | 0.00        | 40.48 | 59.52 | 0.00  |
| 002_D0 | 796                                                       | 77.84       | 0.00  | 0.00  | 22.16 |
| 002_D0 | 896                                                       | 69.42       | 0.00  | 0.00  | 30.58 |
| 002_D0 | 922                                                       | 0.00        | 75.65 | 24.35 | 0.00  |
| 002_D0 | 962                                                       | 0.00        | 22.04 | 77.96 | 0.00  |
| 002_D0 | 1075                                                      | 0.00        | 69.89 | 0.00  | 30.11 |
| 002_D0 | 1378                                                      | 0.00        | 71.60 | 28.40 | 0.00  |
| 002_D0 | 1471                                                      | 0.00        | 57.05 | 42.95 | 0.00  |
| 002_D0 | 1503                                                      | 69.05       | 0.00  | 0.00  | 30.95 |
| 002_D0 | 1510                                                      | 0.00        | 73.35 | 26.65 | 0.00  |
| 002_D0 | 1525                                                      | 71.88       | 0.00  | 0.00  | 28.13 |
| 002_D0 | 1530                                                      | 0.00        | 29.68 | 70.32 | 0.00  |
| 002_D0 | 1561                                                      | 70.60       | 0.00  | 0.00  | 29.40 |
| 002_D0 | 1882                                                      | 0.00        | 33.10 | 66.90 | 0.00  |
| 002_D0 | 2482                                                      | 28.00       | 0.00  | 0.00  | 72.00 |
| 002_D0 | 2488                                                      | 0.00        | 27.84 | 72.16 | 0.00  |
| 002_D0 | 2521                                                      | 0.00        | 68.68 | 31.32 | 0.00  |
| 002_D0 | 2527                                                      | 0.00        | 25.79 | 74.21 | 0.00  |
| 002_D0 | 2704                                                      | 0.00        | 72.84 | 27.16 | 0.00  |
| 002_D0 | 2755                                                      | 0.00        | 78.66 | 21.34 | 0.00  |
| 002_D0 | 2803                                                      | 82.18       | 0.00  | 0.00  | 17.82 |
| 002_D0 | 2809                                                      | 0.00        | 65.93 | 34.07 | 0.00  |
| 002_D0 | 2831                                                      | 0.00        | 33.33 | 66.67 | 0.00  |
| 002_D0 | 3001                                                      | 0.00        | 78.02 | 21.98 | 0.00  |
| 002_D0 | 3002                                                      | 0.00        | 79.67 | 20.33 | 0.00  |
| 002_D0 | 3025                                                      | 0.00        | 21.93 | 78.07 | 0.00  |
| 002_D0 | 3049                                                      | 0.00        | 78.71 | 21.29 | 0.00  |
| 002_D0 | 3121                                                      | 16.04       | 72.64 | 0.00  | 11.32 |
| 002_D0 | 3172                                                      | 0.00        | 67.61 | 32.39 | 0.00  |
| 002_D0 | 3238                                                      | 0.00        | 29.21 | 70.79 | 0.00  |
| 002_D0 | 3320                                                      | 0.00        | 71.65 | 28.35 | 0.00  |
| 002_D0 | 3418                                                      | 37.11       | 0.00  | 0.00  | 62.89 |
| 002_D0 | 3451                                                      | 0.00        | 37.69 | 62.31 | 0.00  |
| 002_D0 | 3577                                                      | 0.00        | 76.68 | 23.32 | 0.00  |
| 002_D0 | 3742                                                      | 0.00        | 28.65 | 71.35 | 0.00  |
| 002_D0 | 3772                                                      | 0.00        | 77.59 | 22.41 | 0.00  |
| 002_D0 | 3928                                                      | 61.36       | 0.00  | 0.00  | 38.64 |
| 002_D0 | 4000                                                      | 0.00        | 76.58 | 23.42 | 0.00  |
| 002_D0 | 4051                                                      | 0.00        | 26.72 | 73.28 | 0.00  |
| 002_D0 | 4228                                                      | 0.00        | 67.18 | 32.82 | 0.00  |
| 002_D0 | 4525                                                      | 34.69       | 0.00  | 0.00  | 65.31 |
| 002_D0 | 4660                                                      | 0.00        | 65.79 | 34.21 | 0.00  |
| 002_D0 | 4693                                                      | 0.00        | 28.03 | 71.97 | 0.00  |
| 002_D0 | 4724                                                      | 64.77       | 0.00  | 0.00  | 35.23 |
| 002_D0 | 4837                                                      | 28.47       | 0.00  | 0.00  | 71.53 |
| 002_D0 | 5377                                                      | 0.00        | 36.55 | 63.45 | 0.00  |
| 002_D0 | 5461                                                      | 24.83       | 0.00  | 0.00  | 75.17 |
| 002_D0 | 5479                                                      | 0.00        | 62.17 | 37.83 | 0.00  |
| 002_D0 | 5551                                                      | 72.84       | 0.00  | 0.00  | 27.16 |
| 002_D0 | 5735                                                      | 0.00        | 39.13 | 60.87 | 0.00  |
| 002_D0 | 5767                                                      | 0.00        | 67.47 | 32.53 | 0.00  |
| 002_D0 | 5833                                                      | 0.00        | 38.04 | 61.96 | 0.00  |
| 002_D0 | 5902                                                      | 55.07       | 0.00  | 0.00  | 44.93 |
| 002_D0 | 5920                                                      | 44.44       | 0.00  | 0.00  | 55.56 |
| 002_D0 | 6082                                                      | 72.95       | 0.00  | 0.00  | 27.05 |
| 002_D0 | 6145                                                      | 0.00        | 30.36 | 69.64 | 0.00  |
| 002_D0 | 6199                                                      | 70.24       | 0.00  | 0.00  | 29.76 |
| 002_D0 | 6238                                                      | 79.84       | 0.00  | 0.00  | 20.16 |
| 002_D0 | 6490                                                      | 0.00        | 67.86 | 32.14 | 0.00  |
| 002_D0 | 6619                                                      | 0.00        | 26.71 | 73.29 | 0.00  |

|        |      |       |       |       |       |
|--------|------|-------|-------|-------|-------|
| 002_D0 | 6673 | 74.87 | 0.00  | 0.00  | 25.13 |
| 002_D0 | 6727 | 0.00  | 19.70 | 80.30 | 0.00  |
| 002_D0 | 6844 | 0.00  | 39.28 | 60.72 | 0.00  |
| 002_D0 | 6874 | 78.91 | 0.00  | 0.00  | 21.09 |
| 002_D0 | 7003 | 0.00  | 77.13 | 22.87 | 0.00  |
| 002_D0 | 7021 | 61.02 | 0.00  | 0.00  | 38.98 |
| 002_D0 | 7120 | 67.84 | 32.16 | 0.00  | 0.00  |
| 002_D0 | 7210 | 0.00  | 28.93 | 71.07 | 0.00  |
| 002_D0 | 7222 | 0.00  | 28.79 | 71.21 | 0.00  |
| 002_D0 | 7266 | 56.45 | 0.00  | 0.00  | 43.55 |
| 002_D0 | 7441 | 79.08 | 20.92 | 0.00  | 0.00  |
| 002_D0 | 7486 | 67.77 | 0.00  | 0.00  | 32.23 |
| 002_D0 | 7645 | 63.80 | 0.00  | 0.00  | 36.20 |
| 002_D0 | 7735 | 0.00  | 51.97 | 48.03 | 0.00  |
| 002_D0 | 7957 | 31.60 | 0.00  | 0.00  | 68.40 |
| 002_D0 | 8005 | 26.78 | 0.00  | 0.00  | 73.22 |
| 002_D0 | 8161 | 0.00  | 75.98 | 24.02 | 0.00  |
| 002_D0 | 8263 | 0.00  | 65.03 | 34.97 | 0.00  |
| 002_D0 | 8359 | 0.00  | 32.41 | 67.59 | 0.00  |
| 002_D0 | 8411 | 69.23 | 0.00  | 0.00  | 30.77 |
| 002_D0 | 8413 | 69.13 | 0.00  | 0.00  | 30.87 |
| 002_D0 | 8461 | 0.00  | 70.22 | 29.78 | 0.00  |
| 002_D0 | 8467 | 0.00  | 68.06 | 31.94 | 0.00  |
| 002_D0 | 8470 | 30.83 | 0.00  | 0.00  | 69.17 |
| 002_D0 | 8605 | 0.00  | 30.76 | 69.24 | 0.00  |
| 002_D3 | 307  | 0.00  | 76.74 | 23.26 | 0.00  |
| 002_D3 | 363  | 0.00  | 43.90 | 56.10 | 0.00  |
| 002_D3 | 588  | 0.00  | 71.43 | 28.57 | 0.00  |
| 002_D3 | 896  | 69.85 | 0.00  | 0.00  | 30.15 |
| 002_D3 | 922  | 0.00  | 73.68 | 26.32 | 0.00  |
| 002_D3 | 962  | 0.00  | 24.45 | 75.55 | 0.00  |
| 002_D3 | 1075 | 0.00  | 70.34 | 0.00  | 29.66 |
| 002_D3 | 1378 | 0.00  | 76.42 | 23.58 | 0.00  |
| 002_D3 | 1471 | 0.00  | 54.68 | 45.32 | 0.00  |
| 002_D3 | 1503 | 65.14 | 0.00  | 0.00  | 34.86 |
| 002_D3 | 1510 | 0.00  | 74.14 | 25.86 | 0.00  |
| 002_D3 | 1525 | 71.17 | 0.00  | 0.00  | 28.83 |
| 002_D3 | 1530 | 0.00  | 30.61 | 69.39 | 0.00  |
| 002_D3 | 1561 | 64.51 | 0.00  | 0.00  | 35.49 |
| 002_D3 | 1882 | 0.00  | 29.81 | 70.19 | 0.00  |
| 002_D3 | 2482 | 27.39 | 0.00  | 0.00  | 72.61 |
| 002_D3 | 2488 | 0.00  | 22.22 | 77.78 | 0.00  |
| 002_D3 | 2521 | 0.00  | 68.57 | 31.43 | 0.00  |
| 002_D3 | 2704 | 0.00  | 77.08 | 22.92 | 0.00  |
| 002_D3 | 2755 | 0.00  | 67.92 | 32.08 | 0.00  |
| 002_D3 | 2809 | 0.00  | 66.40 | 33.60 | 0.00  |
| 002_D3 | 2831 | 0.00  | 31.09 | 68.91 | 0.00  |
| 002_D3 | 3001 | 0.00  | 66.67 | 33.33 | 0.00  |
| 002_D3 | 3002 | 0.00  | 67.38 | 32.62 | 0.00  |
| 002_D3 | 3025 | 0.00  | 30.67 | 69.33 | 0.00  |
| 002_D3 | 3049 | 0.00  | 65.85 | 34.15 | 0.00  |
| 002_D3 | 3121 | 16.33 | 83.67 | 0.00  | 0.00  |
| 002_D3 | 3172 | 0.00  | 57.83 | 42.17 | 0.00  |
| 002_D3 | 3238 | 0.00  | 29.55 | 70.45 | 0.00  |
| 002_D3 | 3320 | 0.00  | 71.68 | 28.32 | 0.00  |
| 002_D3 | 3418 | 27.85 | 0.00  | 0.00  | 72.15 |
| 002_D3 | 3451 | 0.00  | 26.69 | 73.31 | 0.00  |
| 002_D3 | 3577 | 0.00  | 74.21 | 25.79 | 0.00  |
| 002_D3 | 3928 | 69.31 | 0.00  | 0.00  | 30.69 |
| 002_D3 | 4000 | 0.00  | 54.55 | 45.45 | 0.00  |
| 002_D3 | 4051 | 0.00  | 35.06 | 64.94 | 0.00  |
| 002_D3 | 4228 | 0.00  | 73.19 | 26.81 | 0.00  |
| 002_D3 | 4525 | 35.79 | 0.00  | 0.00  | 64.21 |
| 002_D3 | 4660 | 0.00  | 62.28 | 37.72 | 0.00  |
| 002_D3 | 4693 | 0.00  | 33.14 | 66.86 | 0.00  |
| 002_D3 | 4724 | 67.18 | 0.00  | 0.00  | 32.82 |

|        |      |       |       |       |       |
|--------|------|-------|-------|-------|-------|
| 002_D3 | 4837 | 25.23 | 0.00  | 0.00  | 74.77 |
| 002_D3 | 5377 | 0.00  | 34.48 | 65.52 | 0.00  |
| 002_D3 | 5461 | 24.08 | 0.00  | 0.00  | 75.92 |
| 002_D3 | 5479 | 0.00  | 59.60 | 40.40 | 0.00  |
| 002_D3 | 5735 | 0.00  | 37.50 | 62.50 | 0.00  |
| 002_D3 | 5767 | 0.00  | 76.12 | 23.88 | 0.00  |
| 002_D3 | 5833 | 0.00  | 28.72 | 71.28 | 0.00  |
| 002_D3 | 5902 | 73.78 | 0.00  | 0.00  | 26.22 |
| 002_D3 | 5920 | 58.86 | 0.00  | 0.00  | 41.14 |
| 002_D3 | 6082 | 75.12 | 0.00  | 0.00  | 24.88 |
| 002_D3 | 6145 | 0.00  | 30.10 | 69.90 | 0.00  |
| 002_D3 | 6199 | 70.62 | 0.00  | 0.00  | 29.38 |
| 002_D3 | 6238 | 66.49 | 0.00  | 0.00  | 33.51 |
| 002_D3 | 6490 | 0.00  | 72.37 | 27.63 | 0.00  |
| 002_D3 | 6619 | 0.00  | 36.86 | 63.14 | 0.00  |
| 002_D3 | 6673 | 68.60 | 0.00  | 0.00  | 31.40 |
| 002_D3 | 6727 | 0.00  | 20.34 | 79.66 | 0.00  |
| 002_D3 | 6844 | 0.00  | 39.87 | 60.13 | 0.00  |
| 002_D3 | 6874 | 79.00 | 0.00  | 0.00  | 21.00 |
| 002_D3 | 7003 | 0.00  | 79.51 | 20.49 | 0.00  |
| 002_D3 | 7021 | 59.87 | 0.00  | 0.00  | 40.13 |
| 002_D3 | 7120 | 67.09 | 32.91 | 0.00  | 0.00  |
| 002_D3 | 7210 | 0.00  | 26.11 | 73.89 | 0.00  |
| 002_D3 | 7222 | 0.00  | 30.51 | 69.49 | 0.00  |
| 002_D3 | 7266 | 55.05 | 0.00  | 0.00  | 44.95 |
| 002_D3 | 7303 | 22.14 | 0.00  | 0.00  | 77.86 |
| 002_D3 | 7441 | 79.09 | 20.91 | 0.00  | 0.00  |
| 002_D3 | 7486 | 68.35 | 0.00  | 0.00  | 31.65 |
| 002_D3 | 7645 | 67.70 | 0.00  | 0.00  | 32.30 |
| 002_D3 | 7735 | 0.00  | 51.02 | 48.98 | 0.00  |
| 002_D3 | 7957 | 25.60 | 0.00  | 0.00  | 74.40 |
| 002_D3 | 8005 | 21.43 | 0.00  | 0.00  | 78.57 |
| 002_D3 | 8161 | 0.00  | 77.23 | 22.77 | 0.00  |
| 002_D3 | 8263 | 0.00  | 65.57 | 34.43 | 0.00  |
| 002_D3 | 8359 | 0.00  | 32.75 | 67.25 | 0.00  |
| 002_D3 | 8411 | 70.69 | 0.00  | 0.00  | 29.31 |
| 002_D3 | 8413 | 69.29 | 0.00  | 0.00  | 30.71 |
| 002_D3 | 8461 | 0.00  | 75.11 | 24.89 | 0.00  |
| 002_D3 | 8467 | 0.00  | 73.86 | 26.14 | 0.00  |
| 002_D3 | 8470 | 25.11 | 0.00  | 0.00  | 74.89 |
| 002_D3 | 8605 | 0.00  | 27.84 | 72.16 | 0.00  |
| 002_D3 | 8842 | 0.00  | 34.62 | 65.38 | 0.00  |
| 002_D3 | 8863 | 0.00  | 34.78 | 65.22 | 0.00  |
| 002_DA | 588  | 0.00  | 74.29 | 25.71 | 0.00  |
| 002_DA | 896  | 65.64 | 0.00  | 0.00  | 34.36 |
| 002_DA | 922  | 0.00  | 67.25 | 32.75 | 0.00  |
| 002_DA | 962  | 0.00  | 24.36 | 75.64 | 0.00  |
| 002_DA | 1075 | 0.00  | 69.65 | 0.00  | 30.35 |
| 002_DA | 1378 | 0.00  | 71.57 | 28.43 | 0.00  |
| 002_DA | 1471 | 0.00  | 58.41 | 41.59 | 0.00  |
| 002_DA | 1503 | 62.63 | 0.00  | 0.00  | 37.37 |
| 002_DA | 1510 | 0.00  | 71.02 | 28.98 | 0.00  |
| 002_DA | 1525 | 71.46 | 0.00  | 0.00  | 28.54 |
| 002_DA | 1530 | 0.00  | 31.30 | 68.70 | 0.00  |
| 002_DA | 1561 | 65.95 | 0.00  | 0.00  | 34.05 |
| 002_DA | 1882 | 0.00  | 34.40 | 65.60 | 0.00  |
| 002_DA | 2482 | 21.24 | 0.00  | 0.00  | 78.76 |
| 002_DA | 2521 | 0.00  | 65.90 | 34.10 | 0.00  |
| 002_DA | 2527 | 0.00  | 20.34 | 79.66 | 0.00  |
| 002_DA | 2704 | 0.00  | 75.89 | 24.11 | 0.00  |
| 002_DA | 2755 | 0.00  | 70.19 | 29.81 | 0.00  |
| 002_DA | 2809 | 0.00  | 64.29 | 35.71 | 0.00  |
| 002_DA | 2831 | 0.00  | 31.11 | 68.89 | 0.00  |
| 002_DA | 3001 | 0.00  | 77.12 | 22.88 | 0.00  |
| 002_DA | 3002 | 0.00  | 75.66 | 24.34 | 0.00  |
| 002_DA | 3025 | 0.00  | 28.83 | 71.17 | 0.00  |

|        |      |       |       |       |       |
|--------|------|-------|-------|-------|-------|
| 002_DA | 3049 | 0.00  | 67.66 | 32.34 | 0.00  |
| 002_DA | 3121 | 17.86 | 66.96 | 0.00  | 15.18 |
| 002_DA | 3172 | 0.00  | 72.34 | 27.66 | 0.00  |
| 002_DA | 3238 | 0.00  | 28.92 | 71.08 | 0.00  |
| 002_DA | 3320 | 0.00  | 70.39 | 29.61 | 0.00  |
| 002_DA | 3418 | 35.24 | 0.00  | 0.00  | 64.76 |
| 002_DA | 3451 | 0.00  | 30.65 | 69.35 | 0.00  |
| 002_DA | 3577 | 0.00  | 79.70 | 20.30 | 0.00  |
| 002_DA | 3742 | 0.00  | 28.57 | 71.43 | 0.00  |
| 002_DA | 3772 | 0.00  | 76.64 | 23.36 | 0.00  |
| 002_DA | 3928 | 60.27 | 0.00  | 0.00  | 39.73 |
| 002_DA | 4000 | 0.00  | 69.30 | 30.70 | 0.00  |
| 002_DA | 4051 | 0.00  | 23.66 | 76.34 | 0.00  |
| 002_DA | 4228 | 0.00  | 66.31 | 33.69 | 0.00  |
| 002_DA | 4525 | 34.73 | 0.00  | 0.00  | 65.27 |
| 002_DA | 4660 | 0.00  | 66.15 | 33.85 | 0.00  |
| 002_DA | 4693 | 0.00  | 28.65 | 71.35 | 0.00  |
| 002_DA | 4724 | 63.93 | 0.00  | 0.00  | 36.07 |
| 002_DA | 4837 | 27.31 | 0.00  | 0.00  | 72.69 |
| 002_DA | 5377 | 0.00  | 34.39 | 65.61 | 0.00  |
| 002_DA | 5461 | 25.28 | 0.00  | 0.00  | 74.72 |
| 002_DA | 5479 | 0.00  | 64.17 | 35.83 | 0.00  |
| 002_DA | 5551 | 74.61 | 0.00  | 0.00  | 25.39 |
| 002_DA | 5602 | 23.13 | 0.00  | 0.00  | 76.88 |
| 002_DA | 5735 | 0.00  | 58.82 | 41.18 | 0.00  |
| 002_DA | 5767 | 0.00  | 65.28 | 34.72 | 0.00  |
| 002_DA | 5833 | 0.00  | 29.46 | 70.54 | 0.00  |
| 002_DA | 5902 | 62.22 | 0.00  | 0.00  | 37.78 |
| 002_DA | 5920 | 57.09 | 0.00  | 0.00  | 42.91 |
| 002_DA | 6082 | 76.07 | 0.00  | 0.00  | 23.93 |
| 002_DA | 6145 | 0.00  | 30.13 | 69.87 | 0.00  |
| 002_DA | 6199 | 73.47 | 0.00  | 0.00  | 26.53 |
| 002_DA | 6490 | 0.00  | 75.96 | 24.04 | 0.00  |
| 002_DA | 6619 | 0.00  | 32.68 | 67.32 | 0.00  |
| 002_DA | 6673 | 69.36 | 0.00  | 0.00  | 30.64 |
| 002_DA | 6727 | 0.00  | 20.33 | 79.67 | 0.00  |
| 002_DA | 6844 | 0.00  | 40.40 | 59.60 | 0.00  |
| 002_DA | 6874 | 78.04 | 0.00  | 0.00  | 21.96 |
| 002_DA | 7003 | 0.00  | 75.10 | 24.90 | 0.00  |
| 002_DA | 7021 | 59.40 | 0.00  | 0.00  | 40.60 |
| 002_DA | 7120 | 72.30 | 27.70 | 0.00  | 0.00  |
| 002_DA | 7210 | 0.00  | 25.96 | 74.04 | 0.00  |
| 002_DA | 7222 | 0.00  | 27.91 | 72.09 | 0.00  |
| 002_DA | 7266 | 59.88 | 0.00  | 0.00  | 40.12 |
| 002_DA | 7441 | 80.80 | 19.20 | 0.00  | 0.00  |
| 002_DA | 7486 | 70.18 | 0.00  | 0.00  | 29.82 |
| 002_DA | 7645 | 68.47 | 0.00  | 0.00  | 31.53 |
| 002_DA | 7735 | 0.00  | 50.71 | 49.29 | 0.00  |
| 002_DA | 7957 | 33.82 | 0.00  | 0.00  | 66.18 |
| 002_DA | 8005 | 26.39 | 0.00  | 0.00  | 73.61 |
| 002_DA | 8161 | 0.00  | 77.11 | 22.89 | 0.00  |
| 002_DA | 8263 | 0.00  | 67.11 | 32.89 | 0.00  |
| 002_DA | 8359 | 0.00  | 32.67 | 67.33 | 0.00  |
| 002_DA | 8411 | 70.44 | 0.00  | 0.00  | 29.56 |
| 002_DA | 8413 | 69.58 | 0.00  | 0.00  | 30.42 |
| 002_DA | 8461 | 0.00  | 73.47 | 26.53 | 0.00  |
| 002_DA | 8467 | 0.00  | 70.23 | 29.77 | 0.00  |
| 002_DA | 8470 | 29.02 | 0.00  | 0.00  | 70.98 |
| 002_DA | 8605 | 0.00  | 29.40 | 70.60 | 0.00  |
| 011_D0 | 546  | 0.00  | 71.81 | 28.19 | 0.00  |
| 011_D0 | 628  | 0.00  | 78.61 | 21.39 | 0.00  |
| 011_D0 | 634  | 76.87 | 0.00  | 0.00  | 23.13 |
| 011_D0 | 2002 | 0.00  | 34.40 | 65.60 | 0.00  |
| 011_D0 | 2131 | 0.00  | 25.09 | 74.91 | 0.00  |
| 011_D0 | 2380 | 0.00  | 38.86 | 61.14 | 0.00  |
| 011_D0 | 2389 | 0.00  | 60.75 | 39.25 | 0.00  |

|        |      |       |       |       |       |
|--------|------|-------|-------|-------|-------|
| 011_D0 | 2500 | 31.71 | 0.00  | 0.00  | 68.29 |
| 011_D0 | 2711 | 0.00  | 27.21 | 72.79 | 0.00  |
| 011_D0 | 2807 | 56.56 | 0.00  | 0.00  | 43.44 |
| 011_D0 | 3007 | 0.00  | 73.71 | 26.29 | 0.00  |
| 011_D0 | 3480 | 77.67 | 22.33 | 0.00  | 0.00  |
| 011_D0 | 3778 | 55.33 | 0.00  | 0.00  | 44.67 |
| 011_D0 | 3895 | 0.00  | 20.89 | 79.11 | 0.00  |
| 011_D0 | 4024 | 56.68 | 0.00  | 0.00  | 43.32 |
| 011_D0 | 4219 | 0.00  | 31.03 | 68.97 | 0.00  |
| 011_D0 | 4228 | 0.00  | 56.03 | 0.00  | 43.97 |
| 011_D0 | 4396 | 0.00  | 19.82 | 80.18 | 0.00  |
| 011_D0 | 5275 | 0.00  | 46.76 | 53.24 | 0.00  |
| 011_D0 | 5587 | 0.00  | 33.53 | 66.47 | 0.00  |
| 011_D0 | 5701 | 20.88 | 0.00  | 0.00  | 79.12 |
| 011_D0 | 5842 | 0.00  | 73.06 | 26.94 | 0.00  |
| 011_D0 | 5929 | 0.00  | 29.33 | 70.67 | 0.00  |
| 011_D0 | 5942 | 0.00  | 77.09 | 22.91 | 0.00  |
| 011_D0 | 6061 | 0.00  | 74.86 | 25.14 | 0.00  |
| 011_D0 | 6124 | 0.00  | 21.95 | 78.05 | 0.00  |
| 011_D0 | 6259 | 0.00  | 45.48 | 54.52 | 0.00  |
| 011_D0 | 7513 | 25.70 | 0.00  | 0.00  | 74.30 |
| 011_D0 | 7546 | 78.91 | 0.00  | 0.00  | 21.09 |
| 011_D0 | 7648 | 0.00  | 34.55 | 65.45 | 0.00  |
| 011_D0 | 7816 | 0.00  | 76.15 | 23.85 | 0.00  |
| 011_D0 | 7915 | 0.00  | 79.25 | 20.75 | 0.00  |
| 011_D0 | 7978 | 68.18 | 0.00  | 0.00  | 31.82 |
| 011_D0 | 8014 | 0.00  | 50.54 | 49.46 | 0.00  |
| 011_D0 | 8046 | 73.63 | 0.00  | 0.00  | 26.37 |
| 011_D0 | 8059 | 31.34 | 0.00  | 0.00  | 68.66 |
| 011_D0 | 8071 | 79.45 | 0.00  | 0.00  | 20.55 |
| 011_D0 | 8080 | 0.00  | 77.77 | 22.23 | 0.00  |
| 011_D0 | 8095 | 0.00  | 79.63 | 20.37 | 0.00  |
| 011_D0 | 8101 | 0.00  | 74.08 | 25.92 | 0.00  |
| 011_D0 | 8317 | 0.00  | 77.65 | 22.35 | 0.00  |
| 011_D0 | 8419 | 0.00  | 75.82 | 24.18 | 0.00  |
| 011_D0 | 8692 | 0.00  | 70.25 | 29.75 | 0.00  |
| 011_D3 | 546  | 0.00  | 57.84 | 42.16 | 0.00  |
| 011_D3 | 634  | 79.71 | 0.00  | 0.00  | 20.29 |
| 011_D3 | 1165 | 25.48 | 0.00  | 0.00  | 74.52 |
| 011_D3 | 1256 | 21.76 | 0.00  | 0.00  | 78.24 |
| 011_D3 | 1449 | 79.49 | 0.00  | 20.51 | 0.00  |
| 011_D3 | 2002 | 0.00  | 35.57 | 64.43 | 0.00  |
| 011_D3 | 2131 | 0.00  | 20.50 | 79.50 | 0.00  |
| 011_D3 | 2380 | 0.00  | 42.83 | 57.17 | 0.00  |
| 011_D3 | 2389 | 0.00  | 54.49 | 45.51 | 0.00  |
| 011_D3 | 2417 | 0.00  | 21.88 | 78.12 | 0.00  |
| 011_D3 | 2500 | 43.88 | 0.00  | 0.00  | 56.12 |
| 011_D3 | 2807 | 53.27 | 0.00  | 0.00  | 46.73 |
| 011_D3 | 3778 | 56.10 | 0.00  | 0.00  | 43.90 |
| 011_D3 | 3895 | 0.00  | 25.20 | 74.80 | 0.00  |
| 011_D3 | 4024 | 54.88 | 0.00  | 0.00  | 45.12 |
| 011_D3 | 4177 | 79.84 | 20.16 | 0.00  | 0.00  |
| 011_D3 | 4213 | 13.37 | 0.00  | 86.63 | 0.00  |
| 011_D3 | 4219 | 0.00  | 32.44 | 67.56 | 0.00  |
| 011_D3 | 4228 | 0.00  | 51.56 | 0.00  | 48.44 |
| 011_D3 | 5275 | 0.00  | 48.00 | 52.00 | 0.00  |
| 011_D3 | 5842 | 0.00  | 73.08 | 26.92 | 0.00  |
| 011_D3 | 5929 | 0.00  | 26.41 | 73.59 | 0.00  |
| 011_D3 | 6061 | 0.00  | 70.11 | 29.89 | 0.00  |
| 011_D3 | 6124 | 0.00  | 22.22 | 77.78 | 0.00  |
| 011_D3 | 6250 | 21.60 | 0.00  | 0.00  | 78.40 |
| 011_D3 | 6259 | 0.00  | 48.15 | 51.85 | 0.00  |
| 011_D3 | 6343 | 0.00  | 23.57 | 76.43 | 0.00  |
| 011_D3 | 7513 | 32.09 | 0.00  | 0.00  | 67.91 |
| 011_D3 | 7546 | 69.56 | 0.00  | 0.00  | 30.44 |
| 011_D3 | 7588 | 0.00  | 20.63 | 79.37 | 0.00  |

|        |      |       |       |       |       |
|--------|------|-------|-------|-------|-------|
| 011_D3 | 7648 | 0.00  | 37.25 | 62.75 | 0.00  |
| 011_D3 | 7816 | 0.00  | 79.43 | 20.57 | 0.00  |
| 011_D3 | 8014 | 0.00  | 39.88 | 60.12 | 0.00  |
| 011_D3 | 8059 | 34.70 | 0.00  | 0.00  | 65.30 |
| 011_D3 | 8419 | 0.00  | 77.09 | 22.91 | 0.00  |
| 011_D3 | 8692 | 0.00  | 69.98 | 30.02 | 0.00  |
| 011_D3 | 8716 | 78.84 | 0.00  | 0.00  | 21.16 |
| 011_DA | 546  | 0.00  | 44.50 | 55.50 | 0.00  |
| 011_DA | 1165 | 23.96 | 0.00  | 0.00  | 76.04 |
| 011_DA | 2002 | 0.00  | 29.26 | 70.74 | 0.00  |
| 011_DA | 2131 | 0.00  | 20.32 | 79.68 | 0.00  |
| 011_DA | 2380 | 0.00  | 46.54 | 53.46 | 0.00  |
| 011_DA | 2389 | 0.00  | 58.30 | 41.70 | 0.00  |
| 011_DA | 2500 | 31.51 | 0.00  | 0.00  | 68.49 |
| 011_DA | 2807 | 59.55 | 0.00  | 0.00  | 40.45 |
| 011_DA | 3778 | 58.53 | 0.00  | 0.00  | 41.47 |
| 011_DA | 4024 | 44.19 | 0.00  | 0.00  | 55.81 |
| 011_DA | 4177 | 83.17 | 16.83 | 0.00  | 0.00  |
| 011_DA | 4219 | 0.00  | 28.73 | 71.27 | 0.00  |
| 011_DA | 4228 | 0.00  | 61.09 | 0.00  | 38.91 |
| 011_DA | 5275 | 0.00  | 47.92 | 52.08 | 0.00  |
| 011_DA | 5929 | 0.00  | 21.43 | 78.57 | 0.00  |
| 011_DA | 6061 | 0.00  | 73.59 | 26.41 | 0.00  |
| 011_DA | 6259 | 0.00  | 44.60 | 55.40 | 0.00  |
| 011_DA | 6442 | 20.85 | 0.00  | 0.00  | 79.15 |
| 011_DA | 7513 | 29.38 | 0.00  | 0.00  | 70.62 |
| 011_DA | 7546 | 74.05 | 0.00  | 0.00  | 25.95 |
| 011_DA | 7648 | 0.00  | 34.10 | 65.90 | 0.00  |
| 011_DA | 8014 | 0.00  | 35.37 | 64.63 | 0.00  |
| 011_DA | 8059 | 30.95 | 0.00  | 0.00  | 69.05 |
| 011_DA | 8419 | 0.00  | 79.98 | 20.02 | 0.00  |
| 011_DA | 8692 | 0.00  | 76.44 | 23.56 | 0.00  |
| 011_DA | 9055 | 0.00  | 31.53 | 68.47 | 0.00  |
| 015_D0 | 1564 | 67.22 | 0.00  | 0.00  | 32.78 |
| 015_D0 | 2254 | 79.00 | 0.00  | 0.00  | 21.00 |
| 015_D0 | 3007 | 0.00  | 27.83 | 72.17 | 0.00  |
| 015_D0 | 3268 | 0.00  | 24.04 | 75.96 | 0.00  |
| 015_D0 | 4600 | 0.00  | 74.39 | 25.61 | 0.00  |
| 015_D0 | 5833 | 0.00  | 52.42 | 47.58 | 0.00  |
| 015_D0 | 7145 | 0.00  | 69.66 | 30.34 | 0.00  |
| 015_D0 | 7660 | 40.86 | 0.00  | 0.00  | 59.14 |
| 015_D0 | 8647 | 0.00  | 71.63 | 28.37 | 0.00  |
| 015_D0 | 9121 | 0.00  | 27.59 | 0.00  | 72.41 |
| 015_D3 | 1564 | 53.97 | 0.00  | 0.00  | 46.03 |
| 015_D3 | 4600 | 0.00  | 79.52 | 20.48 | 0.00  |
| 015_D3 | 7145 | 0.00  | 63.83 | 36.17 | 0.00  |
| 015_D3 | 7660 | 47.39 | 0.00  | 0.00  | 52.61 |
| 015_D3 | 8647 | 0.00  | 69.12 | 30.88 | 0.00  |



**Table S4: Summary statistics of polymorphic sites in human pegivirus-1.**

| Sample | Genome assembly size (nt) | Total number of nucleotides |      |      |      | Number of polymorphic sites (% of the total number of polymorphic sites) |           |             |             |           |        | Normalised number of polymorphic sites (X/Y variant sites per 1000 sites of X+Y) |      |      |       |      |      |
|--------|---------------------------|-----------------------------|------|------|------|--------------------------------------------------------------------------|-----------|-------------|-------------|-----------|--------|----------------------------------------------------------------------------------|------|------|-------|------|------|
|        |                           | A                           | T    | C    | G    | A/T                                                                      | A/C       | A/G         | T/C         | T/G       | C/G    | A/T                                                                              | A/C  | A/G  | T/C   | T/G  | C/G  |
| 002_DA | 8714                      | 1569                        | 1999 | 2370 | 2776 | 2 (2.47%)                                                                | 0 (0%)    | 28 (34.57%) | 50 (61.73%) | 1 (1.23%) | 0 (0%) | 0.56                                                                             | 0.00 | 6.44 | 11.44 | 0.21 | 0.00 |
| 002_D0 | 9082                      | 1626                        | 2091 | 2468 | 2897 | 2 (2.38%)                                                                | 0 (0%)    | 30 (35.71%) | 51 (60.71%) | 1 (1.19%) | 0 (0%) | 0.54                                                                             | 0.00 | 6.63 | 11.19 | 0.20 | 0.00 |
| 002_D3 | 9080                      | 1631                        | 2090 | 2470 | 2889 | 3 (3.57%)                                                                | 0 (0%)    | 28 (33.33%) | 52 (61.9%)  | 1 (1.19%) | 0 (0%) | 0.81                                                                             | 0.00 | 6.19 | 11.40 | 0.20 | 0.00 |
| 011_DA | 9273                      | 1672                        | 2102 | 2535 | 2964 | 1 (3.85%)                                                                | 0 (0%)    | 9 (34.62%)  | 15 (57.69%) | 1 (3.85%) | 0 (0%) | 0.26                                                                             | 0.00 | 1.94 | 3.23  | 0.20 | 0.00 |
| 011_D0 | 9112                      | 1646                        | 2081 | 2473 | 2912 | 1 (2.33%)                                                                | 0 (0%)    | 12 (27.91%) | 29 (67.44%) | 1 (2.33%) | 0 (0%) | 0.27                                                                             | 0.00 | 2.63 | 6.37  | 0.20 | 0.00 |
| 011_D3 | 9096                      | 1648                        | 2072 | 2472 | 2904 | 1 (2.7%)                                                                 | 2 (5.41%) | 12 (32.43%) | 21 (56.76%) | 1 (2.7%)  | 0 (0%) | 0.27                                                                             | 0.49 | 2.64 | 4.62  | 0.20 | 0.00 |
| 015_D0 | 9232                      | 1667                        | 2092 | 2535 | 2938 | 0 (0%)                                                                   | 0 (0%)    | 3 (30%)     | 6 (60%)     | 1 (10%)   | 0 (0%) | 0.00                                                                             | 0.00 | 0.65 | 1.30  | 0.20 | 0.00 |
| 015_D3 | 9336                      | 1685                        | 2118 | 2565 | 2968 | 0 (0%)                                                                   | 0 (0%)    | 2 (40%)     | 3 (60%)     | 0 (0%)    | 0 (0%) | 0.00                                                                             | 0.00 | 0.43 | 0.64  | 0.00 | 0.00 |

Supplementary Figures

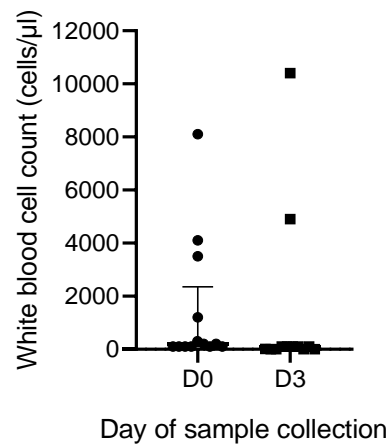

**Figure S1: White blood cell counts on Day 0 (D0) and Day 3 (D3).** D0: low quartile = 100 cells/μl; median = 200 cells/μl, upper-quartile = 2350 cells/μl. D3: low quartile = 0 cells/μl; median = 100 cells/μl, upper-quartile = 100 cells/μl.

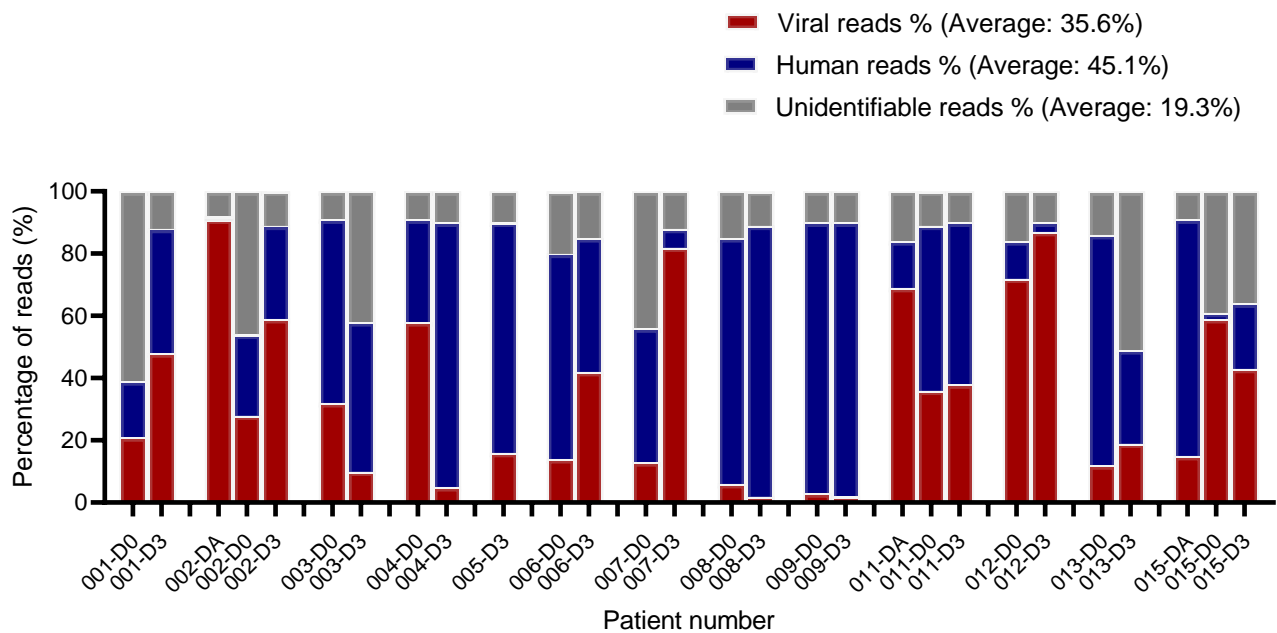

**Figure S2: Frequencies of viral (red), human (blue), and unidentifiable reads (grey) as determined by Virus Identification Pipeline [1].** The actual numbers can be found in **Table S2**.

## **Supplementary Methods S1**

### **Transplantation procedure**

#### **Graft-versus-host-disease (GVHD) prophylaxis**

- Matched related and unrelated donor transplant

Two to 4 days before transplantation, patients received cyclosporin at a dose that was adjusted to achieve a plasma concentration of 250-350 ng/mL or tacrolimus at a dose that was adjusted to achieve a plasma concentration of 5-15 ng/mL. All received a short course of methotrexate.

- Haploidentical donor transplant

The GVHD prophylaxis consisted of cyclophosphamide 50 mg/kg/d on days SCT +3 (3rd day post Stem Cell Transplantation) and SCT +4, and on day SCT +5, tacrolimus or sirolimus was started (total administration time: 6 to 12 months), together with mycophenolate mofetil, 15 mg/kg orally twice daily for 60 days.

#### **Supportive care**

In our pediatric HSCT program, all patients were nursed in single rooms with a high-efficiency particulate air filter system. Antimicrobial prophylaxis consisted of oral itraconazole, penicillin V, and ciprofloxacin. Oral co-trimoxazole was started when the absolute neutrophil count was above  $1.0 \times 10^9$  per liter. Antiviral prophylaxis consisted of daily acyclovir until the cessation of immunosuppressive agents.

## **Supplementary Methods S2**

### **Preparation of the internal control**

Newcastle disease virus (NDV) was isolated from a chicken cloacal swab sample collected at a slaughterhouse, Mukdahan province, Thailand in June 2017. The virus was isolated by inoculating specific-pathogen-free (SPF) ECE and it was confirmed by plate HA inhibition (HI) test. Then, the isolated virus was propagated using MDCK (Madin-Darby canine kidney) cell line (ATCC NBL -2). Viral RNA from culture supernatant was extracted using RNeasy mini kit (Qiagen, Hilden, Germany) and used one-step PCR kit (Qiagen, Hilden, Germany) for viral quantification by real-time RT-PCR. The PCR conditions are given in Supplementary Methods 3. Next, the culture supernatant was divided into portions and stored in sterile screw-capped vials at -80°C.

## **Supplementary Methods S3**

### **qRT-PCR protocols**

The NDV primers used for PCR amplification were 5'-GGAGGATGTTGGCAGCATT-3' and 5'-GTCAACATATACACCTCATC-3', which resulted in a product of 318 bp [2]. Initial denaturation was done at 95°C for 15 minutes, followed by 35 cycles of denaturation at 94°C for 30 seconds, annealing at 58°C for 30 seconds, and extension at 72°C for 30 seconds, and then melting curve analysis from 65°C to 95°C.

The HPgV-1 primers used for PCR amplification were 5'-GGTCGTAAATCCCGGTCACC-3' and 5'-CCCACTGGTCCTTGTCAACT-3' which targeted the 5' untranslated region (UTR) [3]. PCR cycle included 30 minutes of reverse transcription at 50°C, 10 minutes of initial PCR activation at 95°C, followed by 50 cycles of denaturation at 95°C

for 20 seconds, annealing at 57°C for 20 seconds, and extension at 72°C for 20 seconds and then melting curve analysis from 65°C to 95°C.

## References

1. Li, Y.; Wang, H.; Nie, K.; Zhang, C.; Zhang, Y.; Wang, J.; Niu, P.; Ma, X. VIP: an integrated pipeline for metagenomics of virus identification and discovery. *Scientific reports* **2016**, *6*, 1-10.
2. Stäuber, N.; Brechtbühl, K.; Bruckner, L.; Hofmann, M.A. Detection of Newcastle disease virus in poultry vaccines using the polymerase chain reaction and direct sequencing of amplified cDNA. *Vaccine* **1995**, *13*, 360-364.
3. Shahzamani, K.; Jahanbakhsh, S.; Lashgarian, H. Qualitative detection of GB Virus C and Hepatitis C Virus co-infection in cirrhotic patients using a SYBR green multiplex RT-PCR technique. *Tropical Biomedicine* **2017**, *34*, 822-830.
